# Supplementary material for: Comparison of Growth Performance, Immunity, Antioxidant Capacity, and Liver Transcriptome of Calves between Whole Milk and Plant Protein-Based Milk Replacer under the Same Energy and Protein Levels
Source: MDPI journal article supplement (doi:10.3390/antiox11020270), 2022-01-29
Supplement: s1 [file s1]

**Table S1.** The composition and nutritional value of starter (dry matter basis).

| Ingredients                            | Rate | Items                                | Nutritional value |
|----------------------------------------|------|--------------------------------------|-------------------|
| Corn (%)                               | 25   | Dry matter, DM (%,<br>air dry basis) | 89.5              |
| Extrude corn (%)                       | 10   | Crude protein, CP<br>(%)             | 23.63             |
| Wheat flour (%)                        | 4.5  | Crude fat (%)                        | 4.98              |
| Soybean meal (%)                       | 25   | Neutral detergent<br>fiber (%)       | 16.56             |
| Extruded soybean (%)                   | 8    | Acid detergent fiber<br>(%)          | 6.78              |
| Wheat bran (%)                         | 6    | Ash (%)                              | 7.69              |
| Soybean molasses (%)                   | 7    | Calcium (%)                          | 1.51              |
| Distillers dried grain and soluble (%) | 5    | Phosphate (%)                        | 0.96              |
| Glucose (%)                            | 2    | GE/(MJ/kg)                           | 18.32             |
| Dried whey powder (%)                  | 3    |                                      |                   |
| Limestone (%)                          | 2.2  |                                      |                   |
| CaHPO <sub>4</sub> (%)                 | 0.5  |                                      |                   |
| NaCl (%)                               | 0.8  |                                      |                   |
| Premix <sup>1</sup> (%)                | 1    |                                      |                   |

<sup>1</sup> The premix provided the following per kg of the starter: vitamin A 15000 IU, vitamin D 5000 IU, vitamin E 50 mg, Fe 90 mg, Cu 12.5 mg, Mn 60 mg, Zn 100 mg, Se 0.3 mg, Co 0.5 mg.

**Table S2.** Gene primers used in the study for quantitative RT-PCR.

| Gene                            | Prime sequence 5'-3'                         | GenBank Accession no |
|---------------------------------|----------------------------------------------|----------------------|
| <i>PCK1</i>                     | CCATCATTGACCCTG<br>AGAGCCTCGTAGACC           | NM_174737.2          |
| <i>CCND1</i>                    | GCCGAGGAGAACAAAGCAG<br>GTCAGGCGGTGATAGGAG    | NM_001046273.2       |
| <i>ACACA</i>                    | TGGTGGGAATAAAAGTG<br>TGGAAGAGTTGGGATA        | NM_174224.2          |
| <i>GSTM3</i>                    | GCTACAACCCTGACCACGAA<br>GGCACTTGGGCTCAAACATA | NM_001046560.1       |
| <i>STAT3</i>                    | GCGATGGAGTATGTGC<br>CTTTCGTGTTTGTGCC         | NM_001012671.2       |
| <i>MMP9</i>                     | CGCTATGGCTACACTCCT<br>GTGGGCATCTCCCTGAAT     | NM_174744.2          |
| <i>CYP4A22</i>                  | TTCATCAATTCCCGTCTC<br>CTCCAATAGCAGCAAACC     | NM_001098990.1       |
| <i>NAT10</i>                    | CCGCTGAGAACAAGACCACG<br>AATCCAGGCACAGCAAGTCG | NM_001098031.2       |
| <i><math>\beta</math>-actin</i> | ATGATATTGCTGCGCTCGTG<br>CCGTGCTCAATGGGGTACTT | NM_173979.3          |

**Table S3.** Summary of the average statistics of the sequence quality and alignment information between two groups.

| Sample | Total reads | Raw Reads | Clean Reads | Q20    | Q30    | GC Content | Uniquely mapped   | Total mapped      |
|--------|-------------|-----------|-------------|--------|--------|------------|-------------------|-------------------|
| MAW1   | 46648134    | 30591430  | 23324067    | 98.32% | 95.33% | 51.49%     | 42899582 (91.96%) | 43612430 (93.49%) |
| MAW2   | 46612130    | 31156645  | 23306065    | 98.21% | 95.13% | 51.58%     | 41143372 (88.27%) | 41884672 (89.86%) |
| MAW3   | 46616304    | 30964128  | 23308152    | 98.31% | 95.29% | 52.09%     | 42681774 (91.56%) | 43486822 (93.29%) |
| MAW4   | 48920386    | 32866404  | 24460193    | 98.34% | 95.35% | 51.90%     | 45001964 (91.99%) | 45828284 (93.68%) |
| MBW1   | 44846768    | 29602801  | 22423384    | 98.32% | 95.31% | 51.73%     | 41177208 (91.82%) | 42052568 (93.77%) |
| MBW2   | 49010088    | 32834585  | 24505044    | 98.23% | 95.03% | 52.10%     | 44782448 (91.37%) | 45621604 (93.09%) |
| MBW3   | 42137578    | 27946101  | 21068789    | 98.22% | 95.03% | 51.81%     | 38620962 (91.65%) | 39395290 (93.49%) |
| MBW4   | 37358748    | 24731334  | 18679374    | 98.33% | 95.32% | 52.41%     | 34458854 (92.24%) | 35124766 (94.02%) |
| RAW1   | 48934112    | 32254260  | 24467056    | 98.28% | 95.23% | 51.91%     | 44768604 (91.49%) | 45546906 (93.08%) |
| RAW2   | 51361650    | 34557013  | 25680825    | 98.38% | 95.43% | 51.97%     | 47577256 (92.63%) | 48421868 (94.28%) |
| RAW3   | 50138218    | 32722485  | 25069109    | 98.23% | 95.10% | 51.86%     | 46147780 (92.04%) | 47087710 (93.92%) |
| RAW4   | 46662016    | 31272754  | 23331008    | 98.24% | 95.04% | 52.23%     | 43062342 (92.29%) | 43883548 (94.05%) |
| RBW1   | 46680024    | 31284824  | 23340012    | 98.32% | 95.32% | 51.91%     | 42708316 (91.49%) | 43666300 (93.54%) |
| RBW2   | 46692260    | 31150104  | 23346130    | 98.26% | 95.18% | 51.92%     | 42998928 (92.09%) | 43783558 (93.77%) |
| RBW3   | 47817114    | 33243440  | 23908557    | 98.26% | 95.19% | 51.87%     | 43719936 (91.43%) | 44617978 (93.31%) |
| RBW4   | 46249580    | 30567655  | 23124790    | 98.27% | 95.19% | 51.90%     | 42485202 (91.86%) | 43277646 (93.57%) |

**Table S4.** KEGG enrichment analysis of differentially expressed genes between RBW and MBW. (N=4 per group).

| Pathway name                                                             | ID       | P-value | Genes                                                                                                                                        |
|--------------------------------------------------------------------------|----------|---------|----------------------------------------------------------------------------------------------------------------------------------------------|
| The top 15 enrichment pathway based on the upregulated DEGs (RBW vs MBW) |          |         |                                                                                                                                              |
| Metabolism of xenobiotics by cytochrome P450                             | bta00980 | 8.7E-09 | LOC540544 ADH5 SULT2A1 Novel02331 ADH6 LOC100138004 HSD11B1 GSTA5 GSTA3 Novel01381 GSTM1 GSTA2 EPHX1 ENSBTAG00000039362 AKR7A2 GSTM3         |
| Chemical carcinogenesis                                                  | bta05204 | 5.3E-08 | LOC540544 ADH5 SULT2A1 Novel02331 ADH6 GSTA2 HSD11B1 GSTA5 CYP3A5 GSTA3 ENSBTAG00000015775 GSTM1 EPHX1 ENSBTAG00000039362 LOC100138004 GSTM3 |
| Drug metabolism - cytochrome P450                                        | bta00982 | 1.8E-07 | FMO5 LOC540544 ADH5 GSTM3 Novel02331 GSTA3 GSTA2 AOX1 ADH6 GSTA5 FMO1 GSTM1 LOC100138004 ENSBTAG00000039362                                  |
| Steroid hormone biosynthesis                                             | bta00140 | 4.6E-06 | LOC540544 AKR1D1 Novel02331 STS HSD11B1 CYP7A1 CYP3A5 COMT HSD17B2 HSD17B12 LOC100138004 ENSBTAG00000039362                                  |
| Retinol metabolism                                                       | bta00830 | 2.4E-05 | LOC540544 ADH5 ALDH1A1 ADH6 Novel02331 AOX1 CYP4A22 CYP3A5 RDH16 LOC100138004 ENSBTAG00000039362                                             |
| Primary bile acid biosynthesis                                           | bta00120 | 1.0E-04 | HSD17B4 CYP27A1 SCP2 AKR1D1 CYP7A1 CYP39A1                                                                                                   |
| Pentose and glucuronate interconversions                                 | bta00040 | 2.4E-04 | LOC540544 UGDH Novel02331 SORD LOC100138004 ALDH3A2 ENSBTAG00000039362                                                                       |
| Ascorbate and aldarate metabolism                                        | bta00053 | 4.1E-04 | LOC540544 UGDH Novel02331 LOC100138004 ALDH3A2 ENSBTAG00000039362                                                                            |
| PPAR signaling pathway                                                   | bta03320 | 6.4E-04 | CPT1A CYP27A1 SCP2 CYP4A22 SCD CYP7A1 ENSBTAG00000047957 FADS2 ACADM PCK1                                                                    |
| Starch and sucrose metabolism                                            | bta00500 | 2.5E-03 | LOC540544 UGDH Novel02331 G6PC TREH LOC100138004 ENSBTAG00000039362                                                                          |
| Fatty acid metabolism                                                    | bta01212 | 3.1E-03 | CPT1A HACD3 SCD ENSBTAG00000047957 FADS2 HSD17B12 ACADM                                                                                      |
| Biosynthesis of unsaturated fatty acids                                  | bta01040 | 3.4E-03 | FADS2 HSD17B12 ENSBTAG00000047957 SCD HACD3                                                                                                  |
| FoxO signaling pathway                                                   | bta04068 | 4.9E-03 | IRS2 FBXO32 INSR IGF1R GADD45A STAT3 CCNB3 CAT G6PC GADD45B IL7R PCK1                                                                        |
| Fatty acid degradation                                                   | bta00071 | 6.0E-03 | ADH6 CPT1A ADH5 CYP4A22 ACADM ALDH3A2                                                                                                        |
| Platinum drug resistance                                                 | bta01524 | 1.1E-02 | MSH2 GSTM3 ERBB2 REV3L GSTA2 GSTA5 GSTA3 GSTM1                                                                                               |

The top 15 enrichment pathway based on the downregulated DEGs (RBW vs MBW)

|                                                          |          |         |                                                                                          |
|----------------------------------------------------------|----------|---------|------------------------------------------------------------------------------------------|
| Mineral absorption                                       | bta04978 | 3.2E-03 | SLC40A1 HMOX1 MT2A SLC30A1 HMOX2 ATP1B2                                                  |
| Pyrimidine metabolism                                    | bta00240 | 5.6E-03 | CANT1 Novel01289 POLR3E Novel00553 NME2 POLR3B CTPS1 POLR3H UPP1                         |
| Apoptosis                                                | bta04210 | 5.9E-03 | CTSC TUBA1C TNFRSF10D FAS CTSZ ENSBTAG00000047389 PIK3R1 ACTG1 ACTB MAP3K5 TUBA8         |
| Influenza A                                              | bta05164 | 1.0E-02 | PYCARD TNFRSF10D IL1B CCL2 ENSBTAG00000047389 GSK3B PIK3R1 ACTG1 ACTB TMPRSS4 FAS MAP2K3 |
| Fatty acid biosynthesis                                  | bta00061 | 1.1E-02 | ACACA ACSL3 FASN                                                                         |
| Maturity onset diabetes of the young                     | bta04950 | 1.1E-02 | FOXA3 ONECUT1 HNF1A HES1                                                                 |
| TNF signaling pathway                                    | bta04668 | 2.4E-02 | IL1B CX3CL1 MMP9 CCL2 PIK3R1 MAP3K5 FAS MAP2K3                                           |
| Steroid biosynthesis                                     | bta00100 | 3.0E-02 | FDFT1 CYP51A1 SQLE                                                                       |
| Terpenoid backbone biosynthesis                          | bta00900 | 3.3E-02 | HMGCR MVD HMGCS1                                                                         |
| Signaling pathways regulating pluripotency of stem cells | bta04550 | 3.4E-02 | ONECUT1 INHBE GSK3B INHBA FGFR2 HNF1A DVL2 FZD7 PIK3R1                                   |
| Insulin signaling pathway                                | bta04910 | 3.4E-02 | SREBF1 SORBS1 PPP1R3B SLC2A4 FASN GSK3B PIK3R1 ACACA PPP1R3C                             |
| Vitamin digestion and absorption                         | bta04977 | 3.7E-02 | SLC19A2 LRAT SLC5A6                                                                      |
| AMPK signaling pathway                                   | bta04152 | 4.4E-02 | SREBF1 HMGCR SLC2A4 FASN CCND1 PIK3R1 ACACA CPT1B                                        |
| Cytosolic DNA-sensing pathway                            | bta04623 | 4.6E-02 | POLR3H IL1B POLR3E POLR3B PYCARD                                                         |
| Salmonella infection                                     | bta05132 | 5.2E-02 | ACTG1 IL1B CCL3 PYCARD RILP ACTB                                                         |

---

MBW (liver samples from the milk group before weaned); RBW (liver samples from the milk replacer group before weaned).

**Table S5.** GO analysis (top 20) of downregulated genes of the liver of calves between RBW and MBW group. (N=4 per group).

| GO accession | Description                                                                                | Term type          | P-value | Gene                                                 |
|--------------|--------------------------------------------------------------------------------------------|--------------------|---------|------------------------------------------------------|
| GO:0055114   | oxidation-reduction process                                                                | Biological process | 4.6E-04 | HMOX1 CS KIAA1217 NAT10 HMOX2 ND6 ND5 COMMD3<br>ACLY |
| GO:0046912   | transferase activity transferring acyl groups acyl groups converted into alkyl on transfer | Molecular function | 5.3E-04 | HMGCS1 ACLYCS                                        |
| GO:0005125   | cytokine activity                                                                          | Molecular function | 1.0E-03 | CCL2 EIF2B2 CCL3 CX3CL1 CCL21                        |
| GO:0015980   | energy derivation by oxidation of organic compounds                                        | Biological process | 1.1E-03 | KIAA1217 NAT10 ND6 ND5 COMMD3 ACLY CS                |
| GO:0045333   | cellular respiration                                                                       | Biological process | 1.1E-03 | CS ACLY COMMD3 ND5 ND6 NAT10 KIAA1217                |
| GO:0003954   | NADH dehydrogenase activity                                                                | Molecular function | 2.6E-03 | ND6 ND5 NAT10 KIAA1217                               |
| GO:0006120   | mitochondrial electron transport NADH to ubiquinone                                        | Biological process | 2.6E-03 | KIAA1217 NAT10 ND5 ND6                               |
| GO:0008137   | NADH dehydrogenase (ubiquinone) activity                                                   | Molecular function | 2.6E-03 | KIAA1217 NAT10 ND5 ND6                               |
| GO:0050136   | NADH dehydrogenase (quinone) activity                                                      | Molecular function | 2.6E-03 | ND6 ND5 NAT10 KIAA1217                               |
| GO:0001664   | G protein-coupled receptor binding                                                         | Molecular function | 2.9E-03 | CX3CL1 CCL21 CCL2 CCL3                               |
| GO:0008009   | chemokine activity                                                                         | Molecular function | 2.9E-03 | CCL3 CCL2 CCL21 CX3CL1                               |
| GO:0042379   | chemokine receptor binding                                                                 | Molecular function | 2.9E-03 | CCL21 CX3CL1 CCL3 CCL2                               |
| GO:0016746   | transferase activity transferring acyl groups                                              | Molecular function | 3.0E-03 | SAT2PLA2G15NAT10HMGCS1ACLYCS                         |
| GO:0016655   | oxidoreductase activity acting on NAD(P)H quinone or similar compound as acceptor          | Molecular function | 3.3E-03 | KIAA1217 NAT10 ND6 ND5                               |
| GO:0004392   | heme oxygenase (decyclizing) activity                                                      | Molecular function | 3.5E-03 | HMOX1 HMOX2                                          |
| GO:0006787   | porphyrin-containing compound catabolic process                                            | Biological process | 3.5E-03 | HMOX1 HMOX2                                          |
| GO:0006788   | heme oxidation                                                                             | Biological process | 3.5E-03 | HMOX1 HMOX2                                          |
| GO:0033015   | tetrapyrrole catabolic process                                                             | Biological process | 3.5E-03 | HMOX1 HMOX2                                          |
| GO:0051187   | cofactor catabolic process                                                                 | Biological process | 3.5E-03 | HMOX1 HMOX2                                          |
| GO:0004108   | citrate (Si)-synthase activity                                                             | Molecular function | 3.7E-03 | ACLY CS                                              |

MBW (liver samples from the milk group before weaned); RBW (liver samples from the milk replacer group before weane.

**Table S6.** KEGG enrichment analysis of differentially expressed genes between RAW and MAW. (N=4 per group).

| Pathway name                                                                | ID       | P-value | Genes                                                                                                        |
|-----------------------------------------------------------------------------|----------|---------|--------------------------------------------------------------------------------------------------------------|
| The top 15 enrichment pathway based on the downregulated DEGs (RAW vs. MAW) |          |         |                                                                                                              |
| Metabolic pathways                                                          | bta01100 | 3.4E-04 | Novel01818 TPH1 LOC104968656 LDHA ND5 FUT4 UROS PLCE1 MRI1 ANPEP CYTB SYNJ2 NMNAT2 GBA3 ASPA                 |
| Bile secretion                                                              | bta04976 | 3.9E-03 | SLC22A7 ABCG8 AQP1                                                                                           |
| TGF-beta signaling pathway                                                  | bta04350 | 6.1E-03 | INHBC BMP5 INHBE                                                                                             |
| Circadian rhythm                                                            | bta04710 | 9.4E-03 | CRY1 ARNTL                                                                                                   |
| Thyroid hormone signaling pathway                                           | bta04919 | 1.4E-02 | PLCE1 ENSBTAG00000010814 THRB                                                                                |
| Cysteine and methionine metabolism                                          | bta00270 | 1.6E-02 | MRI1 LDHA                                                                                                    |
| Tryptophan metabolism                                                       | bta00380 | 1.8E-02 | TPH1 LOC104968656                                                                                            |
| Hedgehog signaling pathway                                                  | bta04340 | 1.8E-02 | DHH HHIP                                                                                                     |
| Notch signaling pathway                                                     | bta04330 | 1.9E-02 | Novel00962 MAML3                                                                                             |
| Parkinson's disease                                                         | bta05012 | 2.7E-02 | ND5 CYTB GPR37                                                                                               |
| Inositol phosphate metabolism                                               | bta00562 | 4.1E-02 | PLCE1 SYNJ2                                                                                                  |
| Phosphatidylinositol signaling system                                       | bta04070 | 7.0E-02 | PLCE1 SYNJ2                                                                                                  |
| Selenocompound metabolism                                                   | bta00450 | 7.9E-02 | LOC104968656                                                                                                 |
| Proximal tubule bicarbonate reclamation                                     | bta04964 | 9.4E-02 | AQP1                                                                                                         |
| Histidine metabolism                                                        | bta00340 | 1.1E-01 | ASPA                                                                                                         |
| The top 15 enrichment pathway based on the upregulated DEGs (RAW vs. MAW)   |          |         |                                                                                                              |
| Osteoclast differentiation                                                  | bta04380 | 3.0E-05 | ENSBTAG00000019348 ENSBTAG00000039892 Novel03047 ENSBTAG00000000930 Novel03048 Novel01105 ENSBTAG00000039086 |
| Antigen processing and presentation                                         | bta04612 | 1.3E-03 | CTSV ENSBTAG00000008959 Novel01758 IFI30                                                                     |
| Viral carcinogenesis                                                        | bta05203 | 3.5E-03 | CDKN2B Novel01758 CCND1 CDK6 ENSBTAG00000008959 ENSBTAG00000046865                                           |
| Phagosome                                                                   | bta04145 | 3.6E-03 | TUBB2B CTSV ENSBTAG00000008959 TUBB2A Novel01758                                                             |
| Cell cycle                                                                  | bta04110 | 8.7E-03 | GADD45B CDKN2B CCND1 CDK6                                                                                    |

|                            |          |         |                                     |
|----------------------------|----------|---------|-------------------------------------|
| Viral myocarditis          | bta05416 | 9.2E-03 | ENSBTAG00000008959 Novel01758 CCND1 |
| p53 signaling pathway      | bta04115 | 9.9E-03 | GADD45B CCND1 CDK6                  |
| Oxytocin signaling pathway | bta04921 | 1.7E-02 | RYR1 MYLK4 Novel01649 CCND1         |
| Small cell lung cancer     | bta05222 | 1.8E-02 | CDK6 CDKN2B CCND1                   |
| Circadian rhythm           | bta04710 | 1.8E-02 | Novel00918 NR1D1                    |
| Graft-versus-host disease  | bta05332 | 2.6E-02 | ENSBTAG00000008959 Novel01758       |
| Allograft rejection        | bta05330 | 3.5E-02 | ENSBTAG00000008959 Novel01758       |
| Type I diabetes mellitus   | bta04940 | 4.1E-02 | ENSBTAG00000008959 Novel01758       |
| Lysosome                   | bta04142 | 4.3E-02 | DNASE2B CTSV GM2A                   |
| Autoimmune thyroid disease | bta05320 | 5.1E-02 | ENSBTAG00000008959 Novel01758       |

---

MAW (liver samples from the milk group after weaned); RAW (liver samples from the milk replacer group after weane.



Cluster analysis of differentially expressed genes

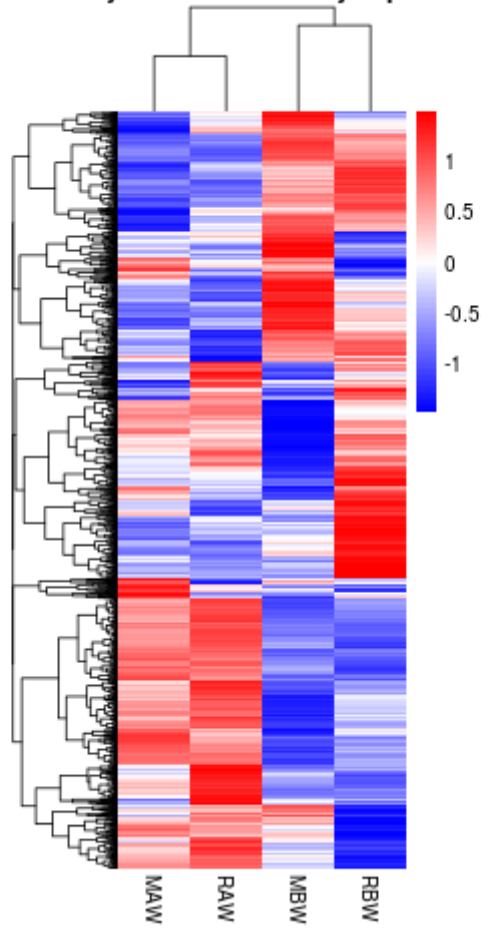

**Figure S1.** Heatmap showing the gene expression data of the significantly differentially expressed genes.

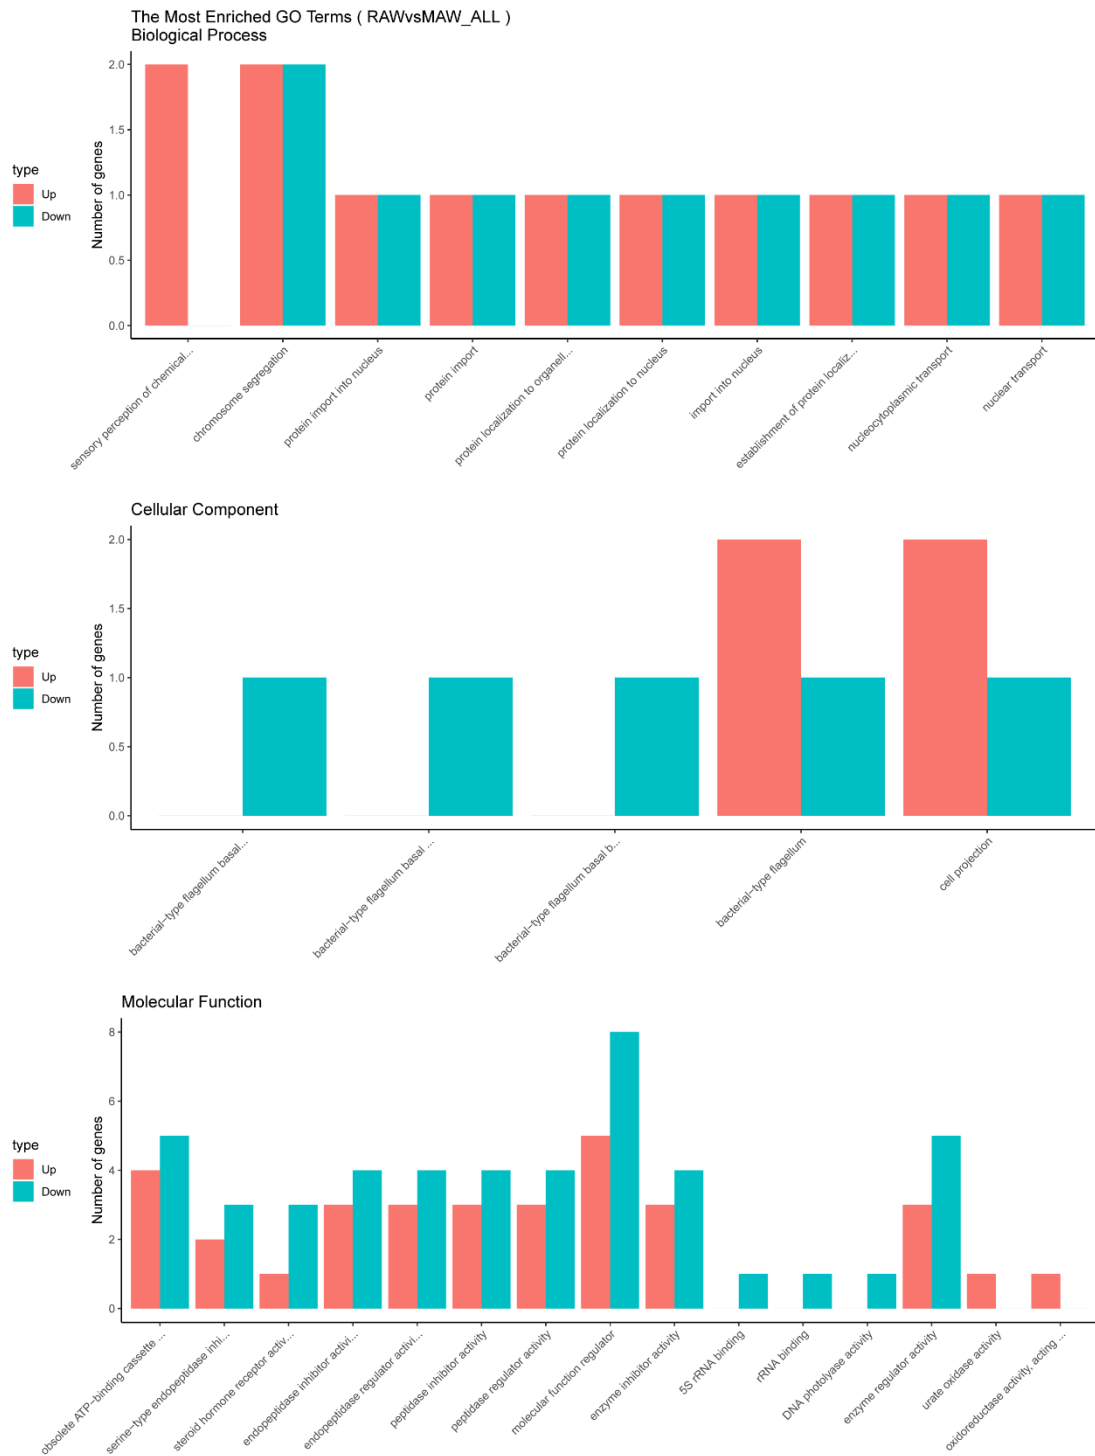

**Figure S2.** GO analysis DEGs of the liver of calves between RAW and MAW group.

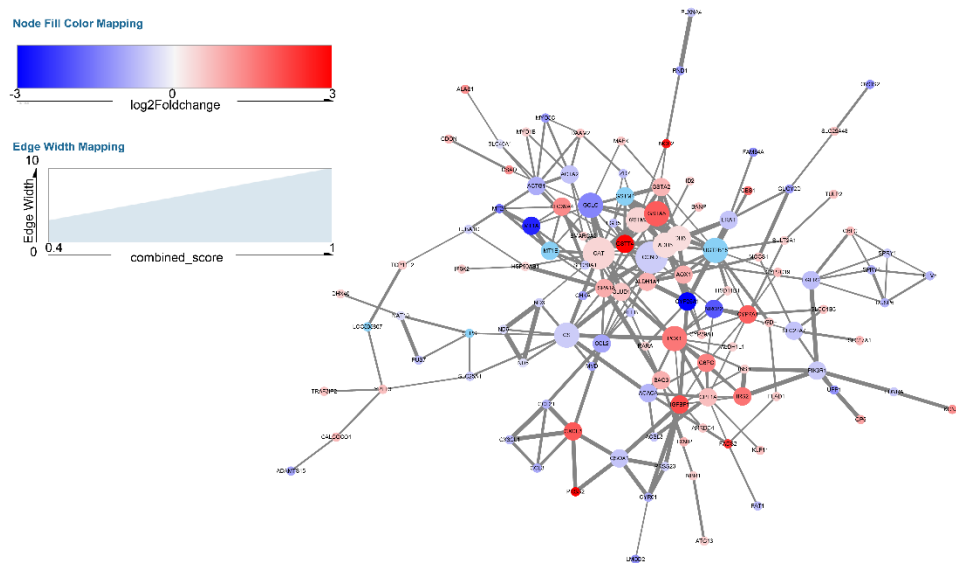

**Figure S3.** STRING analysis shows that differentially expressed genes are involved in TOP 200 and predicted protein-protein interactions between RBW and MBW. Circles of different sizes represent the significance of predicting associations. Red represents upregulated protein and blue represents downregulated protein. MBW (liver samples from the milk group before weaned); RBW (liver samples from the milk replacer group before weaned).

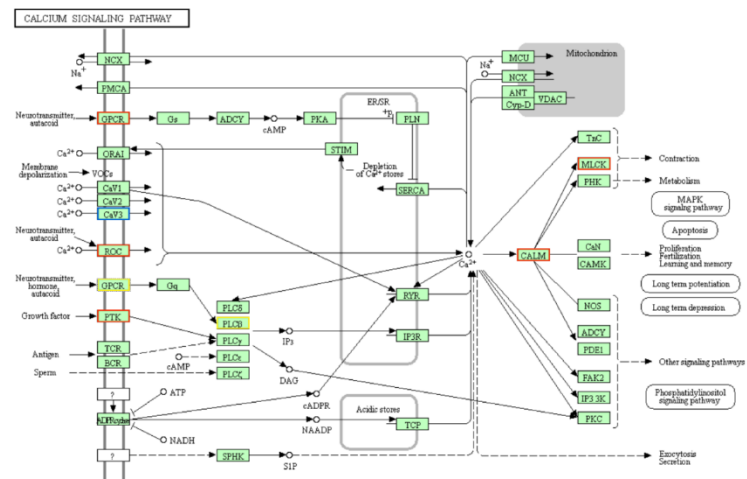

**Figure S4.** Sketch map of calcium signaling pathway between RBW and MBW group.

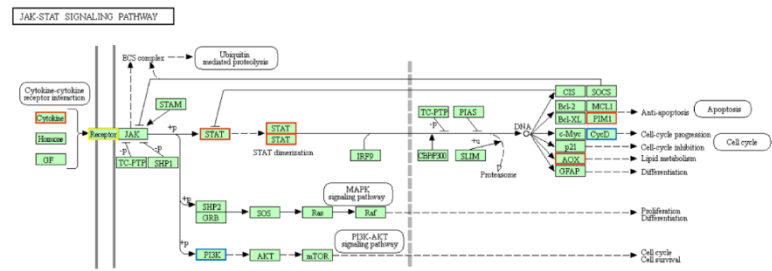

**Figure S5.** Sketch map of JAK-STAT signaling pathway RBW and MBW group.
